# Supplementary material for: Rbg1–Tma46 dimer structure reveals new functional domains and their role in polysome recruitment
Source: PubMed Central journal article supplement (PMC3510508; doi:10.1093/nar/gks867), 2012-09-23
Supplement: supp_gks867_nar-00543-m-2012-File008.pdf [file supp_gks867_nar-00543-m-2012-File008.pdf]

**SUPPLEMENTARY DATA for**

**Rbg1-Tma46 dimer structure reveals new functional domains and their role in polysome recruitment**

Sandrea M. Francis<sup>1</sup>, María-Eugenia Gas<sup>2</sup>, Marie-Claire Daugeron<sup>3,4</sup>, Jeronimo Bravo<sup>1</sup>, Bertrand Séraphin<sup>2,3</sup>

<sup>1</sup> Instituto de Biomedicina de Valencia (IBV-CSIC), Calle Jaime Roig, 11, Valencia E-46010, Spain

<sup>2</sup> Equipe Labellisée La Ligue, Institut de Génétique et de Biologie Moléculaire et Cellulaire (IGBMC), Institut National de Santé et de Recherche Médicale (INSERM) U964/Centre National de Recherche Scientifique (CNRS) UMR 7104/Université de Strasbourg, 67404 Illkirch, France.

<sup>3</sup> Equipe Labellisée La Ligue, CGM, CNRS FRE3144, 1 Avenue de la Terrasse, 91198 Gif sur Yvette Cedex, France

<sup>4</sup> Univ Paris-Sud, Orsay, F-91405

Correspondence to: Jeronimo Bravo, Instituto de Biomedicina de Valencia (IBV), Calle Jaime Roig, 11, Valencia – 46010, España. Tel: +34 96 339 1760; Fax: +34 96 369 0800; E-mail: jbravo@ibv.csic.es, and Bertrand Séraphin, IGBMC (Institut de Génétique et de Biologie Moléculaire et Cellulaire), Illkirch F-67400, France Tel +33 (0)3 88 65 33 36; Fax +33 (0)3 88 65 33 37; E-mail: seraphin@igbmc.fr.

**Supplementary Table 1: Plasmid used in this study**

| Names                   | Features                                                                    | References |
|-------------------------|-----------------------------------------------------------------------------|------------|
| pBS4230                 | YCplac111-HA-RBG1 (ARS-CEN-LEU2)                                            | (1)        |
| pBS4236                 | YCplac111-HA-RBG1 <sub>1-293</sub>                                          | this study |
| BS4237                  | YCplac111-HA-RBG1 $\Delta$ <sub>175-243</sub><br>with a glycine inserted    | this study |
| pBS4254                 | YCplac111-HA-RBG1 $\Delta$ <sub>171-239</sub><br>with two glycines inserted | this study |
| pBS4426                 | YCplac111-HA-RBG1 <sub>49-369</sub>                                         | this study |
| pBS4231                 | pFL36-HA-TMA46 (ARS-CEN-LEU2)                                               | (1)        |
| pBS4247                 | pFL36-HA-TMA46 <sub>1-320</sub>                                             | this study |
| pBS4248                 | pFL36-HA-TMA46 <sub>1-304</sub>                                             | this study |
| pBS4249                 | pFL36-HA-TMA46 <sub>1-268</sub>                                             | this study |
| pBS4257                 | pFL36-HA-TMA46 $\Delta$ <sub>238-345</sub>                                  | this study |
| pBS4258                 | pFL36-HA-TMA46 <sub>-W249A.K250E</sub>                                      | this study |
| pBS4419                 | pFL36-HA-TMA46 $\Delta$ <sub>215-238</sub>                                  | this study |
| pBS4420                 | pFL36-HA-TMA46 $\Delta$ <sub>215-269</sub>                                  | this study |
| pBS4448                 | pFL36-HA-TMA46 <sub>-I241A F246A</sub>                                      | this study |
| pBS4447                 | pFL36-HA-TMA46 <sub>-I241W</sub>                                            | this study |
| pBS4715                 | pFL36-HA-TMA46 <sub>I243-R268-&gt;26A</sub>                                 | this study |
| pBS4711                 | pRS425- HA-TMA46 $\Delta$ <sub>215-269</sub>                                | this study |
| pBS4712                 | pRS425-HA-TMA46 <sub>1-268</sub>                                            | this study |
| pBS4713                 | pRS425- HA-TMA46 $\Delta$ <sub>238-345</sub>                                | this study |
| pBS4716                 | pRS425- HA-TMA46 <sub>I243-R268-&gt;26A</sub>                               | this study |
| pBS3080                 | 6His-RBG1 <sub>fl</sub>                                                     | this study |
| pBS3445                 | 6His-RBG1 <sub>fl</sub> -TMA46 <sub>205-345</sub>                           | this study |
| pBS3446                 | 6His-RBG1 <sub>fl</sub> -TMA46 <sub>154-345</sub>                           | this study |
| pBS3447                 | 6His-RBG1 <sub>272-369</sub> -TMA46 <sub>205-345</sub>                      | this study |
| pBS3448                 | 6His-RBG1 <sub>272-369</sub> -TMA46 <sub>154-345</sub>                      | this study |
| pBS3449                 | 6His-RBG1 <sub>1-294</sub> -TMA46 <sub>205-345</sub>                        | this study |
| pBS3450                 | 6His-RBG1 <sub>1-294</sub> -TMA46 <sub>154-345</sub>                        | this study |
| pBS4308                 | 6His-RBG1 <sub>(S72V.GKN79)</sub> -TMA46 <sub>205-345</sub>                 | this study |
| pBS4311                 | 6His-RBG1 $\Delta$ <sub>175-243</sub> -TMA46 <sub>205-345</sub>             | this study |
| pBS4312                 | 6His-RBG1 $\Delta$ <sub>171-239</sub> -TMA46 <sub>205-345</sub>             | this study |
| pBS4432                 | 6His-RBG1 $\Delta$ <sub>1-48</sub> -TMA46 <sub>205-345</sub>                | this study |
| pBS4443                 | 6His-RBG1 <sub>(I241A F246A )</sub> -TMA46 <sub>205-345</sub>               | this study |
| pBS4444                 | 6His-RBG1 <sub>(I241W )</sub> -TMA46 <sub>205-345</sub>                     | this study |
| pBS4445                 | 6His-RBG1 <sub>(W249A K250E )</sub> -TMA46 <sub>205-345</sub>               | this study |
| pBS4714                 | 6His-RBG1 <sub>(S72V.AMN79)</sub> -TMA46 <sub>205-345</sub>                 | this study |
| hDrg1                   | 6His-DRG1 <sub>fl</sub> <sup>a</sup>                                        | this study |
| hLerepo4 <sub>dfp</sub> | 6His-LEREPO4 <sub>220-396</sub> <sup>b</sup>                                | this study |
| Rbg1 <sub>s5d2l</sub>   | Rbg1 <sub>176-240</sub> <sup>b</sup>                                        | this study |

<sup>a</sup> Human DRG1 cloned into pET24 vector.

<sup>b</sup> LEREPO4<sub>220-396</sub> was cloned into a modified version of pET28 vector from the pBS3445 plasmid with addition of a cleavage site for PreScission protease enzyme (Obtained vector from Dr. Ramón Campos, (2)).



|         |                                                                                     |
|---------|-------------------------------------------------------------------------------------|
| OBS5113 | CACCGCTGCCGTGATGGTGATGGTGATGCAT                                                     |
| OBS5114 | GGAGTCGCTCACACCAATAACAATTGCCAACTTCGCCCAATG                                          |
| OBS5115 | TTATTGGTGTGAGCGACTCCCTCTCGAGCCTCTTTTGCTC                                            |
| OBS5116 | GGAGTCGCTCCCTACTGGTAGAGAAATCATTCTTAAGATGAG                                          |
| OBS5117 | TACCAGTAGGGAGCGACTCCCTCTCGAGCCTCTTTTGCTC                                            |
| OBS5135 | AGTCGACCATGGCAGCGGTGGTGGTGCTGGTATTGG                                                |
| OBS5136 | CACCGCTGCCATGGTCGACTCTAGAGGATCCTGCATAG                                              |
| OBS5192 | CCAACTTCGCCCAAGCGGAGAAGGACCACGTCATC                                                 |
| OBS5193 | CTCCGCTTGGGCGAAGTTGGCAATTGTTATTGGTG                                                 |
| OBS5194 | CTAACACCAGCAACAATTGCCAACGCCGCCCAATGGAAGAAGGACC                                      |
| OBS5195 | GGGCGGCGTTGGCAATTGTTGCTGGTGTAGCTTGGATTTGTCTAGTT<br>CC                               |
| OBS5196 | CTAACACCATGGACAATTGCCAACTTCGCCCAATG                                                 |
| OBS5197 | GCAATTGTCCATGGTGTAGCTTGGATTTGTCTAG                                                  |
| OBS5211 | AGCTAACACCAGCAACAATTGCCAACTTCGCCCAATG                                               |
| OBS5212 | GGCAATTGTTGCTGGTGTAGCTTGGATTTGTCTAG                                                 |
| OBS5213 | AATTGCCAACGCCGCCCAATGGAAGAAGGACCACG                                                 |
| OBS5214 | TCCATTGGGCGGCGTTGGCAATTGTTGCTGGTGTT                                                 |
| OBS5415 | GCAGCCGCGGCGGCTGCAGCTGCAGCGGCTGCCGCCGCTGCGGCAGC<br>TGTTATTGGTGTTAGCTTGGATTTGTCTAG   |
| OBS5685 | CCCAAGTCCATGGTTTGTGCTCTG                                                            |
| OBS5686 | CAGCCGCCGCGGCTGCAGCTGCGGCAGCCGCCGAGCGGCTGCCGCT<br>AAACCTACTGGTAGAGAAATCATTCTTAAGATG |
| OBS5687 | ATTAACGCGGCCGCGAATTCGCCCTTTTGTGCGGGCG                                               |
| OBS5749 | GTAATGTATTCATCGCCACCGACGGGAACCCGACAAACCCAC                                          |
| OBS5750 | GTCGGTGGCGATGAATACATTACTGTCCAAGTTGACTGGTACTGAGTC                                    |

**Supplementary table 3: Yeast strains used in this study**

| Strains        | Notes                                                                         | Genotypes                                                                               | Reference |
|----------------|-------------------------------------------------------------------------------|-----------------------------------------------------------------------------------------|-----------|
| BMA64 $\alpha$ | WT (reference strains)                                                        | MAT $\alpha$ , ade2-1 his3-11,15 leu2-3,112, $\Delta$ trp1, ura3-1 can 1-100            | (3)       |
| BSY1659        | <i>RBG1::TAP <math>\Delta</math>tma46</i>                                     | MAT?, Rbg1-TAP-TRP1 <sub>KI</sub> , tma46::HISMX6                                       | (1)       |
| BSY1661        | <i>TMA46::TAP <math>\Delta</math>rbg1</i>                                     | MAT?, Tma46-TAP-TRP1 <sub>KI</sub> , rbg1::HISMX6                                       | (1)       |
| BSY2049        | <i><math>\Delta</math>rbg1<math>\Delta</math>rbg2<math>\Delta</math>slh1</i>  | MAT $\alpha$ , $\Delta$ rbg1:: HISMX6<br>$\Delta$ rbg2:: kanMX4 $\Delta$ slh1::TRPK1    | (1)       |
| BSY2057        | <i><math>\Delta</math>tma46<math>\Delta</math>gir2<math>\Delta</math>slh1</i> | MAT $\alpha$ , $\Delta$ tma46::HISMX6<br>$\Delta$ gir2::kanMX4<br>$\Delta$ slh1::HISMX6 | (1)       |

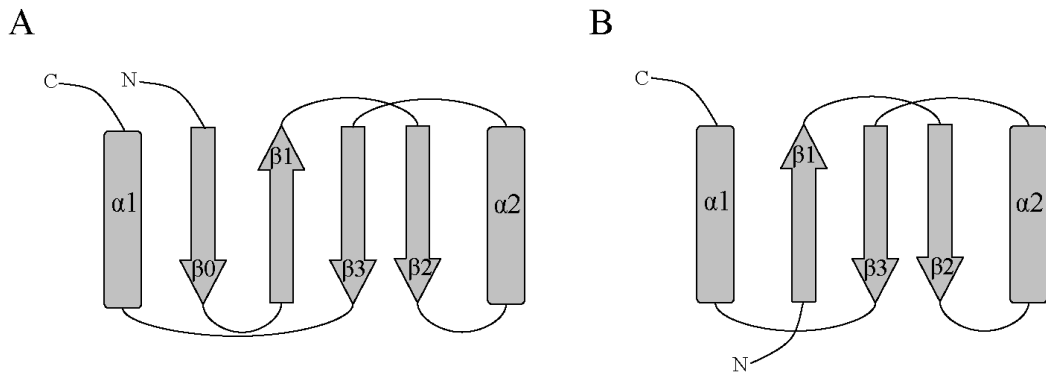

**Supplementary Figure 1:** A. The unusual  $\beta\beta\alpha\beta\alpha$  fold found in 30S and 40S S5 subunit protein C-terminal domain, Elongation factor domain IV, Mevalonate pyrophosphate decarboxylase (GHMP kinase family member) B. The S5D2L domain of Rbg1 having the  $\beta\beta\alpha\beta\alpha$  fold.

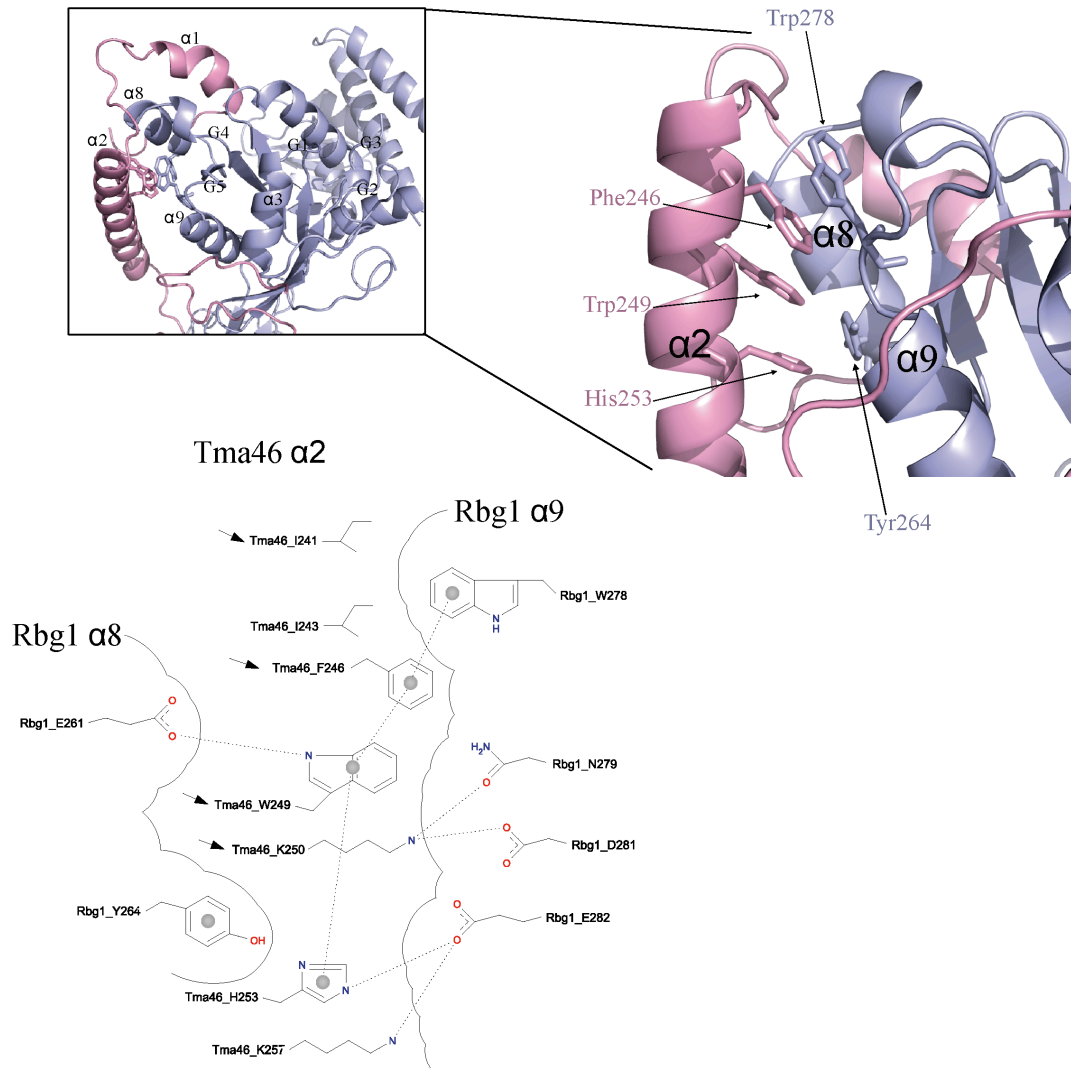

**Supplementary Figure 2:** Inset shows the region in the G-domain of Rbg1 where Tma46 helices  $\alpha 1$  and  $\alpha 2$  and surrounding residues bind. A zoom in on this interface shows, as stick representation, the aromatic residues whose rings stack over each other from Rbg1 helix  $\alpha 8/\alpha 9$  and Tma46 helix  $\alpha 2$  and nearby residues (helix  $\alpha 2$  starts at position 243). Residues Trp278 from Rbg1  $\alpha 9$ , Phe246, Trp249, His253 from Tma46  $\alpha 2$  and Tyr264 from Rbg1  $\alpha 8$  form the pi stacking interaction as can be seen in the two dimensional representation. The aromatic ring of Rbg1 Tyr264 however interacts with its face to the Tma46 Trp249 and His253 edges in an offset position unlike the others, which form a staggered arrangement. The interface is additionally stabilized by the presence of electrostatic and hydrophobic residues.

**A**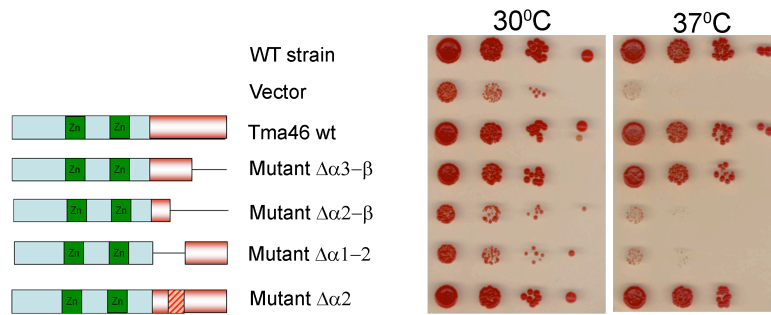**B**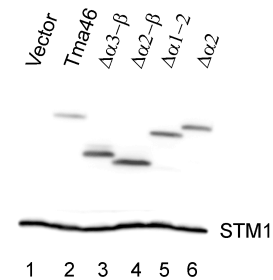**C**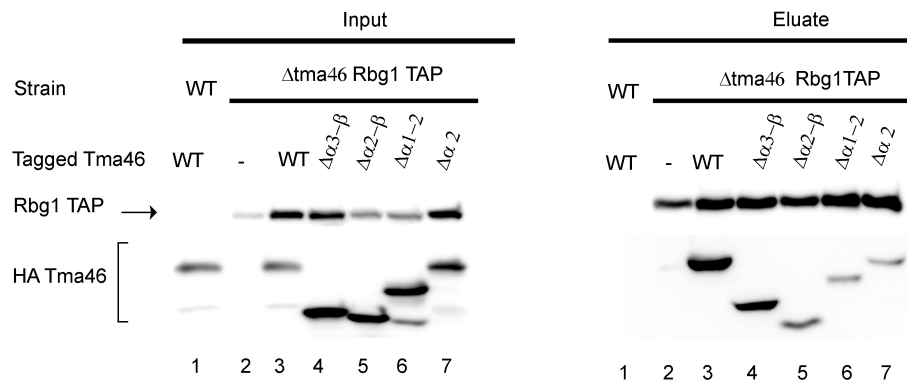

### Supplementary Figure 3: Analysis of Tma46 mutant overexpressed in yeast

A. Complementation assay for Tma46 function. Tma46 mutants encoded on 2-micron plasmids were tested for their ability to complement the growth phenotype of a triple  $\Delta tma46\Delta gir2\Delta slh1$  strain. Serial dilutions of the cells were spotted on selective plates and incubated at 30 or 37°C for 4 days. The structure of the various mutants is shown schematically on the left. WT strain indicates the original wild type parental strain without mutation. Tma46 wt indicates cells transformed with a centromeric plasmid encoding the wild type Tma46 protein. B. Mutant protein accumulation. The level of accumulation of the mutant proteins in cells shown on panel A grown at 30°C was assessed by detecting the HA tag by western blotting. Uniform loading is supported by analysis of the levels of the endogenous Stm1 protein. C. Binding of overexpressed Tma46 mutants carrying deletions of structural elements in its C-terminal region to Rbg1 in yeast. Extracts prepared from  $\Delta tma46$  strains carrying TAP-tagged Rbg1 and the various HA-Tma46 mutants grown at 30°C were used for immunoprecipitation on IgG beads. As positive control, wild type HA-tagged Tma46 expressed from a centromeric plasmid was used. Specificity of the co-precipitation was assessed using a wild type strain expressing wild type HA-tagged Tma46 tagged. Proteins present in extracts (Input) and (co-)precipitated factors (Eluate) were analysed by western blotting. Analysis of the same Tma46 mutants expressed from centromeric plasmids is presented in Figure 3.



A

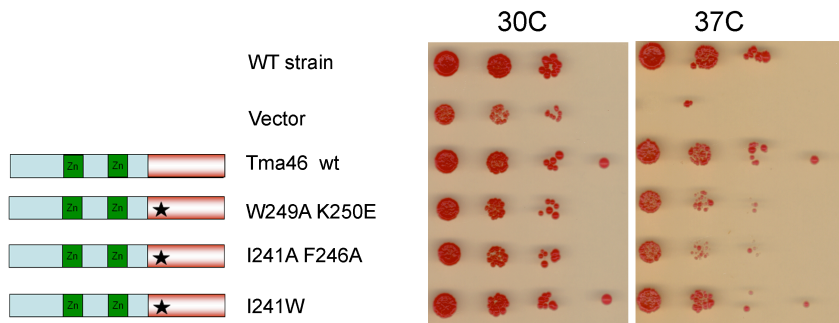

B

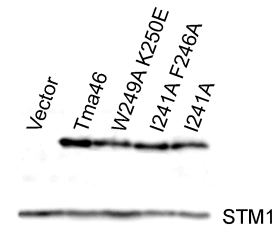

C

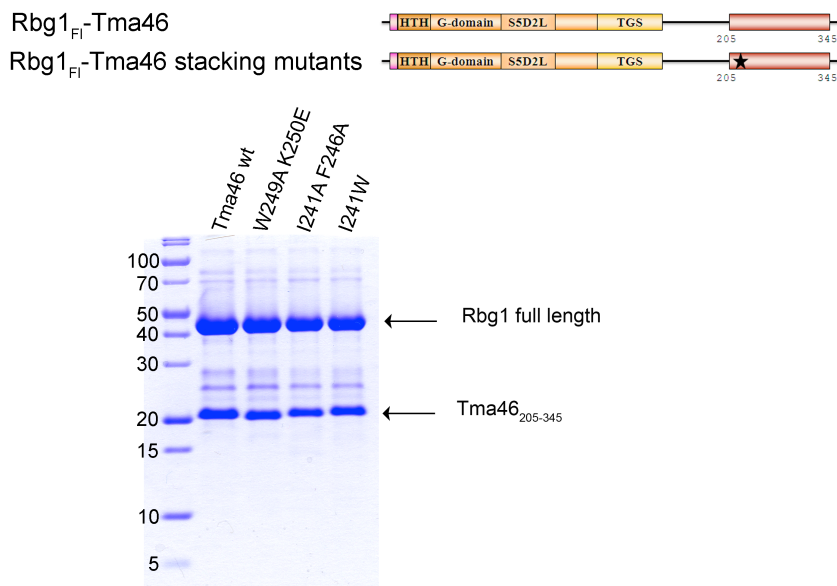

#### Supplementary Figure 4: Analysis of Tma46 point mutants at the interface of Rbg1 and Tma46

A. Complementation assay for Tma46 function. The ability of plasmid-encoded Tma46 mutants to complement the growth phenotype of a triple  $\Delta tma46\Delta gir2\Delta slh1$  strain was assayed by spotting serial dilution on selective plates and incubating at 30 or 37°C for 3 days. The structure of the various mutants is shown schematically on the left. WT strain indicates the original wild type parental strain without mutation. B. Mutant protein accumulation. The level of accumulation of the mutant proteins in cells shown on panel A grown at 30°C was assessed by detecting the HA tag by western blotting. Uniform loading is supported by analysis of the levels of the endogenous Stm1 protein. C. Interaction between recombinant Rbg1 mutants and Tma46 point mutants. Plasmids harbouring operons encoding His6-tagged Rbg1<sub>FI</sub> together with wild type or mutant Tma46 (amino-acids 205-345) were used to express protein in *E. coli*. Recombinant proteins purified on NiNTA agarose were detected by Coomassie staining. Organization of the different operons is shown on the left.

## References

1. Daugeron, M.C., Prouteau, M., Lacroute, F. and Seraphin, B. (2011) The highly conserved eukaryotic DRG factors are required for efficient translation in a manner redundant with the putative RNA helicase Slh1. *Nucleic Acids Res*, **39**, 2221-2233.
2. Campos-Olivas, R., Sanchez, R., Torres, D. and Blanco, F.J. (2007) Backbone assignment of the 98 kDa homotrimeric yeast PCNA ring. *J Biomol NMR*, **38**, 167.
3. Baudin-Baillieu, A., Guillemet, E., Cullin, C. and Lacroute, F. (1997) Construction of a yeast strain deleted for the TRP1 promoter and coding region that enhances the efficiency of the polymerase chain reaction-disruption method. *Yeast*, **13**, 353-356.
